# Supplementary material
Source: publisher figshare collection journal article supplement (https://frontiersin.figshare.com/ndownloader/files/27526256)
Supplement: Supplementary file [file 27526256]

## Supplementary materials

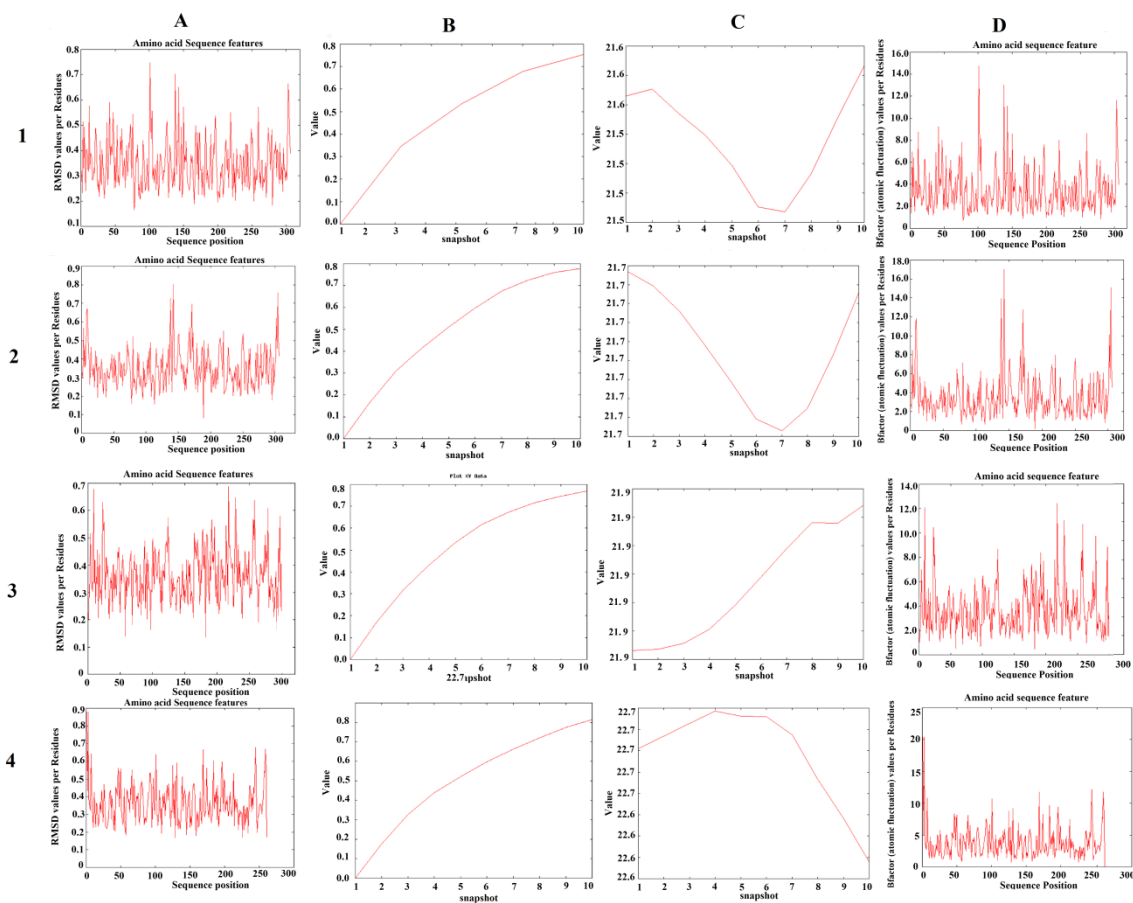

**Figure S1: Molecular dynamic simulation of SARS-CoV-2 3CL M<sup>pro</sup> and bound ligands**

- (1) SARS-CoV-2 3CL M<sup>pro</sup>, (A) RMSD values per residue (B) Trajectory RMSD (C) Radius of Gyration (D) B-factor per residue
- (2) SARS-CoV-2 3CL M<sup>pro</sup> in the presence of Suramin, (A) RMSD values per residue (B) Trajectory RMSD (C) Radius of Gyration (D) B-factor per residue
- (3) SARS-CoV-2 3CL M<sup>pro</sup> in the presence of 2S albumin, (A) RMSD values per residue (B) Trajectory RMSD (C) Radius of Gyration (D) B-factor per residue
- (4) SARS-CoV-2 3CL M<sup>pro</sup> in the presence of flocculating, (A) RMSD values per residue (B) Trajectory RMSD (C) Radius of Gyration (D) B-factor per residue

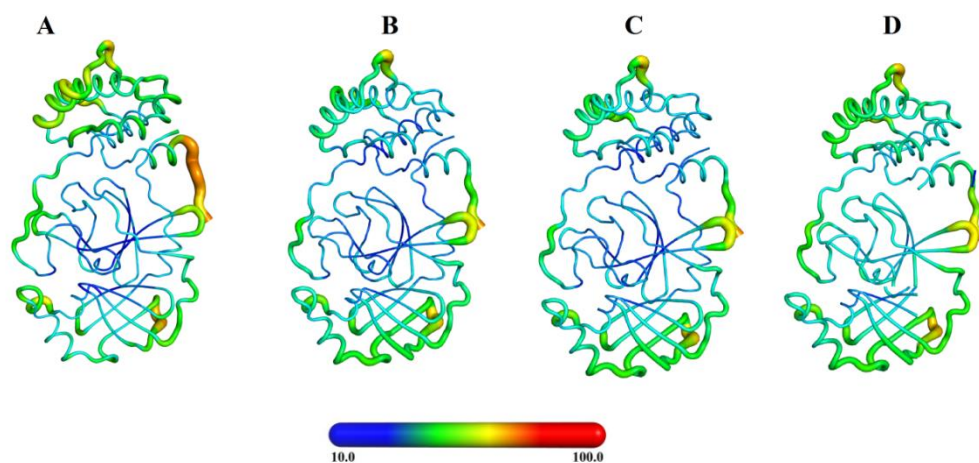

**Figure S2: Temperature B-factor of SARS-CoV-2 3CL M<sup>pro</sup> and bound ligands.** (A) SARS-CoV-2 3CL M<sup>pro</sup> alone (B) SARS-CoV-2 3CL M<sup>pro</sup> with Suramin (C) SARS-CoV-2 3CL M<sup>pro</sup> with 2S albumin (D) SARS-CoV-2 3CL M<sup>pro</sup> with flocculating protein

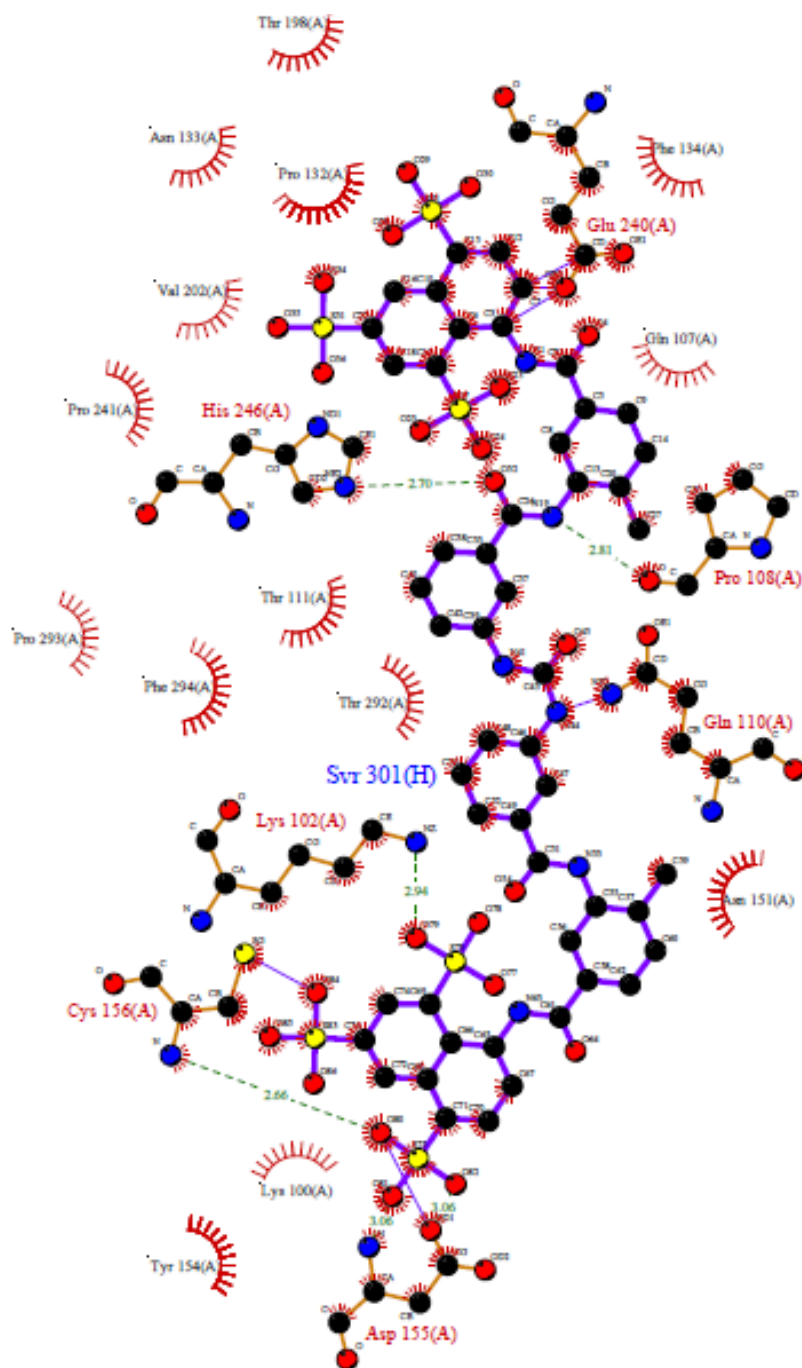

**Figure S3:** Hydrogen bonds and non-bonded contact (hydrophobic interactions) between 3CL M<sup>pro</sup> and Suramin.

**Table S1: List of protein-ligand interactions (3CL M<sup>pro</sup> and Suramin)**

**Hydrogen bonds**

| <----- A T O M 1 -----> |      |      |      |     |       | <----- A T O M 2 -----> |      |      |     |       |          |
|-------------------------|------|------|------|-----|-------|-------------------------|------|------|-----|-------|----------|
|                         | Atom | Atom | Res  | Res |       | Atom                    | Atom | Res  | Res |       |          |
|                         | no.  | name | name | no. | Chain | no.                     | name | name | no. | Chain | Distance |
| 1.                      | 796  | NZ   | LYS  | 102 | A --> | 79                      | O79  | SVR  | 301 | H     | 2.94     |
| 2.                      | 846  | O    | PRO  | 108 | A <-- | 19                      | N19  | SVR  | 301 | H     | 2.81     |
| 3.                      | 1189 | N    | ASP  | 155 | A --> | 81                      | O81  | SVR  | 301 | H     | 3.06     |
| 4.                      | 1195 | OD1  | ASP  | 155 | A <-- | 82                      | O82  | SVR  | 301 | H     | 3.06     |
| 5.                      | 1197 | N    | CYS  | 156 | A --> | 80                      | O80  | SVR  | 301 | H     | 2.66     |
| 6.                      | 1202 | SG   | CYS  | 156 | A --> | 84                      | O84  | SVR  | 301 | H     | 2.17     |
| 7.                      | 1936 | NE2  | HIS  | 246 | A --> | 32                      | O32  | SVR  | 301 | H     | 2.70     |

**Non-bonded contacts**

| <----- A T O M 1 -----> |      |      |      |     |       | <----- A T O M 2 -----> |      |      |     |       |          |
|-------------------------|------|------|------|-----|-------|-------------------------|------|------|-----|-------|----------|
|                         | Atom | Atom | Res  | Res |       | Atom                    | Atom | Res  | Res |       |          |
|                         | no.  | name | name | no. | Chain | no.                     | name | name | no. | Chain | Distance |
| 1.                      | 773  | CD   | LYS  | 100 | A --- | 85                      | O85  | SVR  | 301 | H     | 3.67     |
| 2.                      | 792  | CB   | LYS  | 102 | A --- | 84                      | O84  | SVR  | 301 | H     | 3.71     |
| 3.                      | 794  | CD   | LYS  | 102 | A --- | 79                      | O79  | SVR  | 301 | H     | 3.75     |
| 4.                      | 794  | CD   | LYS  | 102 | A --- | 84                      | O84  | SVR  | 301 | H     | 3.82     |
| 5.                      | 795  | CE   | LYS  | 102 | A --- | 79                      | O79  | SVR  | 301 | H     | 3.88     |
| 6.                      | 796  | NZ   | LYS  | 102 | A --- | 79                      | O79  | SVR  | 301 | H     | 2.94     |
| 7.                      | 838  | CB   | GLN  | 107 | A --- | 27                      | C27  | SVR  | 301 | H     | 3.82     |
| 8.                      | 846  | O    | PRO  | 108 | A --- | 8                       | C8   | SVR  | 301 | H     | 3.14     |
| 9.                      | 846  | O    | PRO  | 108 | A --- | 13                      | C13  | SVR  | 301 | H     | 2.92     |
| 10.                     | 846  | O    | PRO  | 108 | A --- | 19                      | N19  | SVR  | 301 | H     | 2.81     |
| 11.                     | 846  | O    | PRO  | 108 | A --- | 20                      | C20  | SVR  | 301 | H     | 3.67     |
| 12.                     | 847  | CB   | PRO  | 108 | A --- | 23                      | O23  | SVR  | 301 | H     | 3.84     |
| 13.                     | 847  | CB   | PRO  | 108 | A --- | 24                      | O24  | SVR  | 301 | H     | 3.02     |
| 14.                     | 848  | CG   | PRO  | 108 | A --- | 17                      | S17  | SVR  | 301 | H     | 3.64     |
| 15.                     | 848  | CG   | PRO  | 108 | A --- | 23                      | O23  | SVR  | 301 | H     | 3.50     |
| 16.                     | 848  | CG   | PRO  | 108 | A --- | 24                      | O24  | SVR  | 301 | H     | 3.12     |
| 17.                     | 848  | CG   | PRO  | 108 | A --- | 25                      | O25  | SVR  | 301 | H     | 3.64     |
| 18.                     | 855  | CA   | GLN  | 110 | A --- | 41                      | N41  | SVR  | 301 | H     | 3.53     |
| 19.                     | 855  | CA   | GLN  | 110 | A --- | 43                      | C43  | SVR  | 301 | H     | 3.61     |
| 20.                     | 855  | CA   | GLN  | 110 | A --- | 44                      | N44  | SVR  | 301 | H     | 3.58     |
| 21.                     | 858  | CB   | GLN  | 110 | A --- | 41                      | N41  | SVR  | 301 | H     | 3.24     |
| 22.                     | 858  | CB   | GLN  | 110 | A --- | 43                      | C43  | SVR  | 301 | H     | 3.23     |
| 23.                     | 858  | CB   | GLN  | 110 | A --- | 44                      | N44  | SVR  | 301 | H     | 2.72     |
| 24.                     | 858  | CB   | GLN  | 110 | A --- | 46                      | C46  | SVR  | 301 | H     | 3.53     |
| 25.                     | 858  | CB   | GLN  | 110 | A --- | 48                      | C48  | SVR  | 301 | H     | 3.47     |
| 26.                     | 859  | CG   | GLN  | 110 | A --- | 37                      | C37  | SVR  | 301 | H     | 3.66     |
| 27.                     | 859  | CG   | GLN  | 110 | A --- | 39                      | C39  | SVR  | 301 | H     | 3.36     |
| 28.                     | 859  | CG   | GLN  | 110 | A --- | 41                      | N41  | SVR  | 301 | H     | 2.24     |
| 29.                     | 859  | CG   | GLN  | 110 | A --- | 43                      | C43  | SVR  | 301 | H     | 2.68     |
| 30.                     | 859  | CG   | GLN  | 110 | A --- | 44                      | N44  | SVR  | 301 | H     | 2.39     |
| 31.                     | 859  | CG   | GLN  | 110 | A --- | 45                      | O45  | SVR  | 301 | H     | 3.85     |
| 32.                     | 859  | CG   | GLN  | 110 | A --- | 46                      | C46  | SVR  | 301 | H     | 3.61     |
| 33.                     | 860  | CD   | GLN  | 110 | A --- | 41                      | N41  | SVR  | 301 | H     | 2.84     |
| 34.                     | 860  | CD   | GLN  | 110 | A --- | 43                      | C43  | SVR  | 301 | H     | 2.97     |
| 35.                     | 860  | CD   | GLN  | 110 | A --- | 44                      | N44  | SVR  | 301 | H     | 2.22     |
| 36.                     | 860  | CD   | GLN  | 110 | A --- | 46                      | C46  | SVR  | 301 | H     | 3.24     |
| 37.                     | 860  | CD   | GLN  | 110 | A --- | 48                      | C48  | SVR  | 301 | H     | 3.88     |
| 38.                     | 862  | OE1  | GLN  | 110 | A --- | 41                      | N41  | SVR  | 301 | H     | 3.81     |
| 39.                     | 862  | OE1  | GLN  | 110 | A --- | 44                      | N44  | SVR  | 301 | H     | 3.41     |
| 40.                     | 861  | NE2  | GLN  | 110 | A --- | 41                      | N41  | SVR  | 301 | H     | 2.97     |
| 41.                     | 861  | NE2  | GLN  | 110 | A --- | 43                      | C43  | SVR  | 301 | H     | 2.54     |
| 42.                     | 861  | NE2  | GLN  | 110 | A --- | 44                      | N44  | SVR  | 301 | H     | 1.46     |
| 43.                     | 861  | NE2  | GLN  | 110 | A --- | 45                      | O45  | SVR  | 301 | H     | 3.54     |
| 44.                     | 861  | NE2  | GLN  | 110 | A --- | 46                      | C46  | SVR  | 301 | H     | 2.14     |
| 45.                     | 861  | NE2  | GLN  | 110 | A --- | 47                      | C47  | SVR  | 301 | H     | 2.87     |
| 46.                     | 861  | NE2  | GLN  | 110 | A --- | 48                      | C48  | SVR  | 301 | H     | 3.02     |
| 47.                     | 863  | N    | THR  | 111 | A --- | 48                      | C48  | SVR  | 301 | H     | 3.68     |
| 48.                     | 866  | O    | THR  | 111 | A --- | 48                      | C48  | SVR  | 301 | H     | 2.97     |
| 49.                     | 866  | O    | THR  | 111 | A --- | 50                      | C50  | SVR  | 301 | H     | 2.88     |
| 50.                     | 1019 | CA   | PRO  | 132 | A --- | 17                      | S17  | SVR  | 301 | H     | 3.68     |
| 51.                     | 1019 | CA   | PRO  | 132 | A --- | 23                      | O23  | SVR  | 301 | H     | 3.70     |

|      |      |     |     |     |   |     |    |     |     |     |   |      |
|------|------|-----|-----|-----|---|-----|----|-----|-----|-----|---|------|
| 52.  | 1019 | CA  | PRO | 132 | A | --- | 24 | O24 | SVR | 301 | H | 2.86 |
| 53.  | 1020 | C   | PRO | 132 | A | --- | 11 | C11 | SVR | 301 | H | 3.89 |
| 54.  | 1020 | C   | PRO | 132 | A | --- | 17 | S17 | SVR | 301 | H | 3.77 |
| 55.  | 1020 | C   | PRO | 132 | A | --- | 18 | C18 | SVR | 301 | H | 3.52 |
| 56.  | 1020 | C   | PRO | 132 | A | --- | 23 | O23 | SVR | 301 | H | 3.29 |
| 57.  | 1020 | C   | PRO | 132 | A | --- | 24 | O24 | SVR | 301 | H | 3.51 |
| 58.  | 1020 | C   | PRO | 132 | A | --- | 34 | O34 | SVR | 301 | H | 3.81 |
| 59.  | 1021 | O   | PRO | 132 | A | --- | 11 | C11 | SVR | 301 | H | 3.24 |
| 60.  | 1021 | O   | PRO | 132 | A | --- | 17 | S17 | SVR | 301 | H | 3.02 |
| 61.  | 1021 | O   | PRO | 132 | A | --- | 18 | C18 | SVR | 301 | H | 2.75 |
| 62.  | 1021 | O   | PRO | 132 | A | --- | 22 | C22 | SVR | 301 | H | 3.75 |
| 63.  | 1021 | O   | PRO | 132 | A | --- | 23 | O23 | SVR | 301 | H | 2.25 |
| 64.  | 1021 | O   | PRO | 132 | A | --- | 24 | O24 | SVR | 301 | H | 3.22 |
| 65.  | 1021 | O   | PRO | 132 | A | --- | 34 | O34 | SVR | 301 | H | 3.42 |
| 66.  | 1022 | CB  | PRO | 132 | A | --- | 6  | C6  | SVR | 301 | H | 3.80 |
| 67.  | 1022 | CB  | PRO | 132 | A | --- | 11 | C11 | SVR | 301 | H | 3.46 |
| 68.  | 1022 | CB  | PRO | 132 | A | --- | 17 | S17 | SVR | 301 | H | 3.71 |
| 69.  | 1022 | CB  | PRO | 132 | A | --- | 18 | C18 | SVR | 301 | H | 3.76 |
| 70.  | 1022 | CB  | PRO | 132 | A | --- | 24 | O24 | SVR | 301 | H | 2.95 |
| 71.  | 1023 | CG  | PRO | 132 | A | --- | 24 | O24 | SVR | 301 | H | 3.85 |
| 72.  | 1025 | N   | ASN | 133 | A | --- | 34 | O34 | SVR | 301 | H | 3.73 |
| 73.  | 1026 | CA  | ASN | 133 | A | --- | 34 | O34 | SVR | 301 | H | 3.31 |
| 74.  | 1029 | CB  | ASN | 133 | A | --- | 34 | O34 | SVR | 301 | H | 3.46 |
| 75.  | 1042 | CE2 | PHE | 134 | A | --- | 23 | O23 | SVR | 301 | H | 3.35 |
| 76.  | 1043 | CZ  | PHE | 134 | A | --- | 23 | O23 | SVR | 301 | H | 3.66 |
| 77.  | 1158 | CG  | ASN | 151 | A | --- | 50 | C50 | SVR | 301 | H | 3.04 |
| 78.  | 1158 | CG  | ASN | 151 | A | --- | 52 | C52 | SVR | 301 | H | 3.38 |
| 79.  | 1160 | OD1 | ASN | 151 | A | --- | 50 | C50 | SVR | 301 | H | 3.08 |
| 80.  | 1160 | OD1 | ASN | 151 | A | --- | 52 | C52 | SVR | 301 | H | 3.50 |
| 81.  | 1159 | ND2 | ASN | 151 | A | --- | 48 | C48 | SVR | 301 | H | 3.74 |
| 82.  | 1159 | ND2 | ASN | 151 | A | --- | 50 | C50 | SVR | 301 | H | 2.84 |
| 83.  | 1159 | ND2 | ASN | 151 | A | --- | 52 | C52 | SVR | 301 | H | 3.50 |
| 84.  | 1170 | CA  | ASP | 153 | A | --- | 63 | N63 | SVR | 301 | H | 3.45 |
| 85.  | 1170 | CA  | ASP | 153 | A | --- | 65 | C65 | SVR | 301 | H | 2.97 |
| 86.  | 1170 | CA  | ASP | 153 | A | --- | 66 | C66 | SVR | 301 | H | 3.73 |
| 87.  | 1170 | CA  | ASP | 153 | A | --- | 67 | C67 | SVR | 301 | H | 2.58 |
| 88.  | 1170 | CA  | ASP | 153 | A | --- | 70 | C70 | SVR | 301 | H | 3.07 |
| 89.  | 1170 | CA  | ASP | 153 | A | --- | 71 | C71 | SVR | 301 | H | 3.78 |
| 90.  | 1171 | C   | ASP | 153 | A | --- | 65 | C65 | SVR | 301 | H | 3.50 |
| 91.  | 1171 | C   | ASP | 153 | A | --- | 67 | C67 | SVR | 301 | H | 2.67 |
| 92.  | 1171 | C   | ASP | 153 | A | --- | 68 | C68 | SVR | 301 | H | 3.84 |
| 93.  | 1171 | C   | ASP | 153 | A | --- | 70 | C70 | SVR | 301 | H | 2.41 |
| 94.  | 1171 | C   | ASP | 153 | A | --- | 71 | C71 | SVR | 301 | H | 3.09 |
| 95.  | 1171 | C   | ASP | 153 | A | --- | 75 | S75 | SVR | 301 | H | 3.85 |
| 96.  | 1171 | C   | ASP | 153 | A | --- | 81 | O81 | SVR | 301 | H | 3.79 |
| 97.  | 1172 | O   | ASP | 153 | A | --- | 65 | C65 | SVR | 301 | H | 3.54 |
| 98.  | 1172 | O   | ASP | 153 | A | --- | 66 | C66 | SVR | 301 | H | 3.65 |
| 99.  | 1172 | O   | ASP | 153 | A | --- | 67 | C67 | SVR | 301 | H | 2.88 |
| 100. | 1172 | O   | ASP | 153 | A | --- | 68 | C68 | SVR | 301 | H | 3.06 |
| 101. | 1172 | O   | ASP | 153 | A | --- | 70 | C70 | SVR | 301 | H | 2.15 |
| 102. | 1172 | O   | ASP | 153 | A | --- | 71 | C71 | SVR | 301 | H | 2.27 |
| 103. | 1172 | O   | ASP | 153 | A | --- | 75 | S75 | SVR | 301 | H | 2.79 |
| 104. | 1172 | O   | ASP | 153 | A | --- | 80 | O80 | SVR | 301 | H | 2.82 |
| 105. | 1172 | O   | ASP | 153 | A | --- | 81 | O81 | SVR | 301 | H | 3.00 |
| 106. | 1173 | CB  | ASP | 153 | A | --- | 61 | C61 | SVR | 301 | H | 3.31 |
| 107. | 1173 | CB  | ASP | 153 | A | --- | 63 | N63 | SVR | 301 | H | 2.13 |
| 108. | 1173 | CB  | ASP | 153 | A | --- | 64 | O64 | SVR | 301 | H | 3.88 |
| 109. | 1173 | CB  | ASP | 153 | A | --- | 65 | C65 | SVR | 301 | H | 1.62 |
| 110. | 1173 | CB  | ASP | 153 | A | --- | 66 | C66 | SVR | 301 | H | 2.38 |
| 111. | 1173 | CB  | ASP | 153 | A | --- | 67 | C67 | SVR | 301 | H | 1.93 |
| 112. | 1173 | CB  | ASP | 153 | A | --- | 68 | C68 | SVR | 301 | H | 3.09 |
| 113. | 1173 | CB  | ASP | 153 | A | --- | 69 | C69 | SVR | 301 | H | 3.30 |
| 114. | 1173 | CB  | ASP | 153 | A | --- | 70 | C70 | SVR | 301 | H | 2.78 |
| 115. | 1173 | CB  | ASP | 153 | A | --- | 71 | C71 | SVR | 301 | H | 3.26 |
| 116. | 1173 | CB  | ASP | 153 | A | --- | 73 | S73 | SVR | 301 | H | 3.84 |
| 117. | 1173 | CB  | ASP | 153 | A | --- | 78 | O78 | SVR | 301 | H | 3.25 |
| 118. | 1174 | CG  | ASP | 153 | A | --- | 61 | C61 | SVR | 301 | H | 2.54 |
| 119. | 1174 | CG  | ASP | 153 | A | --- | 63 | N63 | SVR | 301 | H | 1.78 |
| 120. | 1174 | CG  | ASP | 153 | A | --- | 64 | O64 | SVR | 301 | H | 2.67 |
| 121. | 1174 | CG  | ASP | 153 | A | --- | 65 | C65 | SVR | 301 | H | 0.80 |
| 122. | 1174 | CG  | ASP | 153 | A | --- | 66 | C66 | SVR | 301 | H | 2.04 |

|      |      |     |     |     |   |     |    |     |     |     |   |      |
|------|------|-----|-----|-----|---|-----|----|-----|-----|-----|---|------|
| 123. | 1174 | CG  | ASP | 153 | A | --- | 67 | C67 | SVR | 301 | H | 0.66 |
| 124. | 1174 | CG  | ASP | 153 | A | --- | 68 | C68 | SVR | 301 | H | 2.70 |
| 125. | 1174 | CG  | ASP | 153 | A | --- | 69 | C69 | SVR | 301 | H | 3.27 |
| 126. | 1174 | CG  | ASP | 153 | A | --- | 70 | C70 | SVR | 301 | H | 1.92 |
| 127. | 1174 | CG  | ASP | 153 | A | --- | 71 | C71 | SVR | 301 | H | 2.66 |
| 128. | 1174 | CG  | ASP | 153 | A | --- | 78 | O78 | SVR | 301 | H | 3.81 |
| 129. | 1175 | OD1 | ASP | 153 | A | --- | 58 | C58 | SVR | 301 | H | 3.44 |
| 130. | 1175 | OD1 | ASP | 153 | A | --- | 61 | C61 | SVR | 301 | H | 2.14 |
| 131. | 1175 | OD1 | ASP | 153 | A | --- | 63 | N63 | SVR | 301 | H | 2.04 |
| 132. | 1175 | OD1 | ASP | 153 | A | --- | 64 | O64 | SVR | 301 | H | 2.03 |
| 133. | 1175 | OD1 | ASP | 153 | A | --- | 65 | C65 | SVR | 301 | H | 1.83 |
| 134. | 1175 | OD1 | ASP | 153 | A | --- | 66 | C66 | SVR | 301 | H | 3.18 |
| 135. | 1175 | OD1 | ASP | 153 | A | --- | 67 | C67 | SVR | 301 | H | 1.22 |
| 136. | 1175 | OD1 | ASP | 153 | A | --- | 68 | C68 | SVR | 301 | H | 3.84 |
| 137. | 1175 | OD1 | ASP | 153 | A | --- | 70 | C70 | SVR | 301 | H | 2.49 |
| 138. | 1175 | OD1 | ASP | 153 | A | --- | 71 | C71 | SVR | 301 | H | 3.59 |
| 139. | 1176 | OD2 | ASP | 153 | A | --- | 61 | C61 | SVR | 301 | H | 3.11 |
| 140. | 1176 | OD2 | ASP | 153 | A | --- | 63 | N63 | SVR | 301 | H | 2.47 |
| 141. | 1176 | OD2 | ASP | 153 | A | --- | 64 | O64 | SVR | 301 | H | 2.98 |
| 142. | 1176 | OD2 | ASP | 153 | A | --- | 65 | C65 | SVR | 301 | H | 1.15 |
| 143. | 1176 | OD2 | ASP | 153 | A | --- | 66 | C66 | SVR | 301 | H | 1.41 |
| 144. | 1176 | OD2 | ASP | 153 | A | --- | 67 | C67 | SVR | 301 | H | 1.32 |
| 145. | 1176 | OD2 | ASP | 153 | A | --- | 68 | C68 | SVR | 301 | H | 1.72 |
| 146. | 1176 | OD2 | ASP | 153 | A | --- | 69 | C69 | SVR | 301 | H | 2.77 |
| 147. | 1176 | OD2 | ASP | 153 | A | --- | 70 | C70 | SVR | 301 | H | 1.69 |
| 148. | 1176 | OD2 | ASP | 153 | A | --- | 71 | C71 | SVR | 301 | H | 1.86 |
| 149. | 1176 | OD2 | ASP | 153 | A | --- | 72 | C72 | SVR | 301 | H | 3.06 |
| 150. | 1176 | OD2 | ASP | 153 | A | --- | 73 | S73 | SVR | 301 | H | 3.84 |
| 151. | 1176 | OD2 | ASP | 153 | A | --- | 74 | C74 | SVR | 301 | H | 3.74 |
| 152. | 1176 | OD2 | ASP | 153 | A | --- | 75 | S75 | SVR | 301 | H | 3.43 |
| 153. | 1176 | OD2 | ASP | 153 | A | --- | 76 | C76 | SVR | 301 | H | 3.87 |
| 154. | 1177 | N   | TYR | 154 | A | --- | 67 | C67 | SVR | 301 | H | 3.41 |
| 155. | 1177 | N   | TYR | 154 | A | --- | 70 | C70 | SVR | 301 | H | 3.09 |
| 156. | 1178 | CA  | TYR | 154 | A | --- | 70 | C70 | SVR | 301 | H | 3.67 |
| 157. | 1178 | CA  | TYR | 154 | A | --- | 81 | O81 | SVR | 301 | H | 3.46 |
| 158. | 1179 | C   | TYR | 154 | A | --- | 81 | O81 | SVR | 301 | H | 3.74 |
| 159. | 1181 | CB  | TYR | 154 | A | --- | 70 | C70 | SVR | 301 | H | 3.17 |
| 160. | 1181 | CB  | TYR | 154 | A | --- | 71 | C71 | SVR | 301 | H | 3.81 |
| 161. | 1181 | CB  | TYR | 154 | A | --- | 75 | S75 | SVR | 301 | H | 3.53 |
| 162. | 1181 | CB  | TYR | 154 | A | --- | 81 | O81 | SVR | 301 | H | 2.32 |
| 163. | 1182 | CG  | TYR | 154 | A | --- | 81 | O81 | SVR | 301 | H | 2.82 |
| 164. | 1184 | CD2 | TYR | 154 | A | --- | 81 | O81 | SVR | 301 | H | 2.74 |
| 165. | 1189 | N   | ASP | 155 | A | --- | 75 | S75 | SVR | 301 | H | 3.63 |
| 166. | 1189 | N   | ASP | 155 | A | --- | 80 | O80 | SVR | 301 | H | 3.11 |
| 167. | 1189 | N   | ASP | 155 | A | --- | 81 | O81 | SVR | 301 | H | 3.06 |
| 168. | 1190 | CA  | ASP | 155 | A | --- | 80 | O80 | SVR | 301 | H | 3.48 |
| 169. | 1191 | C   | ASP | 155 | A | --- | 80 | O80 | SVR | 301 | H | 3.23 |
| 170. | 1193 | CB  | ASP | 155 | A | --- | 80 | O80 | SVR | 301 | H | 3.73 |
| 171. | 1194 | CG  | ASP | 155 | A | --- | 75 | S75 | SVR | 301 | H | 3.66 |
| 172. | 1194 | CG  | ASP | 155 | A | --- | 80 | O80 | SVR | 301 | H | 2.83 |
| 173. | 1194 | CG  | ASP | 155 | A | --- | 81 | O81 | SVR | 301 | H | 3.44 |
| 174. | 1195 | OD1 | ASP | 155 | A | --- | 71 | C71 | SVR | 301 | H | 3.85 |
| 175. | 1195 | OD1 | ASP | 155 | A | --- | 75 | S75 | SVR | 301 | H | 2.41 |
| 176. | 1195 | OD1 | ASP | 155 | A | --- | 80 | O80 | SVR | 301 | H | 1.75 |
| 177. | 1195 | OD1 | ASP | 155 | A | --- | 81 | O81 | SVR | 301 | H | 2.32 |
| 178. | 1195 | OD1 | ASP | 155 | A | --- | 82 | O82 | SVR | 301 | H | 3.06 |
| 179. | 1196 | OD2 | ASP | 155 | A | --- | 80 | O80 | SVR | 301 | H | 3.64 |
| 180. | 1197 | N   | CYS | 156 | A | --- | 75 | S75 | SVR | 301 | H | 3.90 |
| 181. | 1197 | N   | CYS | 156 | A | --- | 80 | O80 | SVR | 301 | H | 2.66 |
| 182. | 1198 | CA  | CYS | 156 | A | --- | 80 | O80 | SVR | 301 | H | 3.32 |
| 183. | 1201 | CB  | CYS | 156 | A | --- | 68 | C68 | SVR | 301 | H | 3.48 |
| 184. | 1201 | CB  | CYS | 156 | A | --- | 72 | C72 | SVR | 301 | H | 2.95 |
| 185. | 1201 | CB  | CYS | 156 | A | --- | 76 | C76 | SVR | 301 | H | 3.32 |
| 186. | 1201 | CB  | CYS | 156 | A | --- | 80 | O80 | SVR | 301 | H | 2.94 |
| 187. | 1201 | CB  | CYS | 156 | A | --- | 83 | S83 | SVR | 301 | H | 3.76 |
| 188. | 1201 | CB  | CYS | 156 | A | --- | 84 | O84 | SVR | 301 | H | 3.37 |
| 189. | 1202 | SG  | CYS | 156 | A | --- | 72 | C72 | SVR | 301 | H | 3.64 |
| 190. | 1202 | SG  | CYS | 156 | A | --- | 74 | C74 | SVR | 301 | H | 3.83 |
| 191. | 1202 | SG  | CYS | 156 | A | --- | 76 | C76 | SVR | 301 | H | 3.27 |
| 192. | 1202 | SG  | CYS | 156 | A | --- | 83 | S83 | SVR | 301 | H | 3.19 |
| 193. | 1202 | SG  | CYS | 156 | A | --- | 84 | O84 | SVR | 301 | H | 2.17 |

|      |      |     |     |     |   |     |    |     |     |     |   |      |
|------|------|-----|-----|-----|---|-----|----|-----|-----|-----|---|------|
| 194. | 1202 | SG  | CYS | 156 | A | --- | 85 | O85 | SVR | 301 | H | 3.84 |
| 195. | 1215 | OG  | SER | 158 | A | --- | 78 | O78 | SVR | 301 | H | 3.79 |
| 196. | 1215 | OG  | SER | 158 | A | --- | 79 | O79 | SVR | 301 | H | 3.84 |
| 197. | 1506 | N   | THR | 196 | A | --- | 35 | O35 | SVR | 301 | H | 3.80 |
| 198. | 1509 | O   | THR | 196 | A | --- | 34 | O34 | SVR | 301 | H | 3.53 |
| 199. | 1509 | O   | THR | 196 | A | --- | 35 | O35 | SVR | 301 | H | 3.43 |
| 200. | 1525 | CB  | THR | 198 | A | --- | 28 | O28 | SVR | 301 | H | 3.60 |
| 201. | 1527 | OG1 | THR | 198 | A | --- | 28 | O28 | SVR | 301 | H | 3.67 |
| 202. | 1526 | CG2 | THR | 198 | A | --- | 21 | S21 | SVR | 301 | H | 3.71 |
| 203. | 1526 | CG2 | THR | 198 | A | --- | 28 | O28 | SVR | 301 | H | 2.49 |
| 204. | 1555 | CG1 | VAL | 202 | A | --- | 38 | C38 | SVR | 301 | H | 3.53 |
| 205. | 1870 | O   | TYR | 239 | A | --- | 30 | O30 | SVR | 301 | H | 3.87 |
| 206. | 1880 | CA  | GLU | 240 | A | --- | 7  | C7  | SVR | 301 | H | 3.87 |
| 207. | 1880 | CA  | GLU | 240 | A | --- | 12 | C12 | SVR | 301 | H | 3.67 |
| 208. | 1883 | CB  | GLU | 240 | A | --- | 4  | O4  | SVR | 301 | H | 3.26 |
| 209. | 1883 | CB  | GLU | 240 | A | --- | 7  | C7  | SVR | 301 | H | 3.53 |
| 210. | 1883 | CB  | GLU | 240 | A | --- | 12 | C12 | SVR | 301 | H | 3.86 |
| 211. | 1884 | CG  | GLU | 240 | A | --- | 1  | N1  | SVR | 301 | H | 3.87 |
| 212. | 1884 | CG  | GLU | 240 | A | --- | 2  | C2  | SVR | 301 | H | 3.48 |
| 213. | 1884 | CG  | GLU | 240 | A | --- | 3  | C3  | SVR | 301 | H | 3.53 |
| 214. | 1884 | CG  | GLU | 240 | A | --- | 4  | O4  | SVR | 301 | H | 2.48 |
| 215. | 1884 | CG  | GLU | 240 | A | --- | 7  | C7  | SVR | 301 | H | 3.04 |
| 216. | 1884 | CG  | GLU | 240 | A | --- | 12 | C12 | SVR | 301 | H | 3.47 |
| 217. | 1885 | CD  | GLU | 240 | A | --- | 1  | N1  | SVR | 301 | H | 2.90 |
| 218. | 1885 | CD  | GLU | 240 | A | --- | 2  | C2  | SVR | 301 | H | 3.05 |
| 219. | 1885 | CD  | GLU | 240 | A | --- | 3  | C3  | SVR | 301 | H | 2.17 |
| 220. | 1885 | CD  | GLU | 240 | A | --- | 4  | O4  | SVR | 301 | H | 2.53 |
| 221. | 1885 | CD  | GLU | 240 | A | --- | 6  | C6  | SVR | 301 | H | 2.95 |
| 222. | 1885 | CD  | GLU | 240 | A | --- | 7  | C7  | SVR | 301 | H | 1.69 |
| 223. | 1885 | CD  | GLU | 240 | A | --- | 10 | C10 | SVR | 301 | H | 3.22 |
| 224. | 1885 | CD  | GLU | 240 | A | --- | 12 | C12 | SVR | 301 | H | 2.16 |
| 225. | 1885 | CD  | GLU | 240 | A | --- | 15 | C15 | SVR | 301 | H | 2.90 |
| 226. | 1886 | OE1 | GLU | 240 | A | --- | 1  | N1  | SVR | 301 | H | 2.17 |
| 227. | 1886 | OE1 | GLU | 240 | A | --- | 2  | C2  | SVR | 301 | H | 2.53 |
| 228. | 1886 | OE1 | GLU | 240 | A | --- | 3  | C3  | SVR | 301 | H | 1.61 |
| 229. | 1886 | OE1 | GLU | 240 | A | --- | 4  | O4  | SVR | 301 | H | 2.43 |
| 230. | 1886 | OE1 | GLU | 240 | A | --- | 6  | C6  | SVR | 301 | H | 2.83 |
| 231. | 1886 | OE1 | GLU | 240 | A | --- | 7  | C7  | SVR | 301 | H | 0.81 |
| 232. | 1886 | OE1 | GLU | 240 | A | --- | 10 | C10 | SVR | 301 | H | 3.33 |
| 233. | 1886 | OE1 | GLU | 240 | A | --- | 12 | C12 | SVR | 301 | H | 1.96 |
| 234. | 1886 | OE1 | GLU | 240 | A | --- | 15 | C15 | SVR | 301 | H | 3.01 |
| 235. | 1887 | OE2 | GLU | 240 | A | --- | 1  | N1  | SVR | 301 | H | 3.45 |
| 236. | 1887 | OE2 | GLU | 240 | A | --- | 2  | C2  | SVR | 301 | H | 3.87 |
| 237. | 1887 | OE2 | GLU | 240 | A | --- | 3  | C3  | SVR | 301 | H | 2.38 |
| 238. | 1887 | OE2 | GLU | 240 | A | --- | 4  | O4  | SVR | 301 | H | 3.47 |
| 239. | 1887 | OE2 | GLU | 240 | A | --- | 6  | C6  | SVR | 301 | H | 2.49 |
| 240. | 1887 | OE2 | GLU | 240 | A | --- | 7  | C7  | SVR | 301 | H | 2.23 |
| 241. | 1887 | OE2 | GLU | 240 | A | --- | 10 | C10 | SVR | 301 | H | 2.38 |
| 242. | 1887 | OE2 | GLU | 240 | A | --- | 11 | C11 | SVR | 301 | H | 3.61 |
| 243. | 1887 | OE2 | GLU | 240 | A | --- | 12 | C12 | SVR | 301 | H | 2.15 |
| 244. | 1887 | OE2 | GLU | 240 | A | --- | 15 | C15 | SVR | 301 | H | 2.23 |
| 245. | 1887 | OE2 | GLU | 240 | A | --- | 16 | C16 | SVR | 301 | H | 3.44 |
| 246. | 1887 | OE2 | GLU | 240 | A | --- | 21 | S21 | SVR | 301 | H | 3.40 |
| 247. | 1887 | OE2 | GLU | 240 | A | --- | 28 | O28 | SVR | 301 | H | 3.65 |
| 248. | 1887 | OE2 | GLU | 240 | A | --- | 30 | O30 | SVR | 301 | H | 3.87 |
| 249. | 1894 | CD  | PRO | 241 | A | --- | 7  | C7  | SVR | 301 | H | 3.59 |
| 250. | 1894 | CD  | PRO | 241 | A | --- | 12 | C12 | SVR | 301 | H | 3.25 |
| 251. | 1933 | CD2 | HIS | 246 | A | --- | 32 | O32 | SVR | 301 | H | 3.27 |
| 252. | 1935 | CE1 | HIS | 246 | A | --- | 32 | O32 | SVR | 301 | H | 3.84 |
| 253. | 1936 | NE2 | HIS | 246 | A | --- | 26 | C26 | SVR | 301 | H | 3.84 |
| 254. | 1936 | NE2 | HIS | 246 | A | --- | 32 | O32 | SVR | 301 | H | 2.70 |
| 255. | 2268 | CB  | THR | 292 | A | --- | 45 | O45 | SVR | 301 | H | 3.69 |
| 256. | 2270 | OG1 | THR | 292 | A | --- | 45 | O45 | SVR | 301 | H | 3.82 |
| 257. | 2269 | CG2 | THR | 292 | A | --- | 45 | O45 | SVR | 301 | H | 3.51 |
| 258. | 2277 | CD  | PRO | 293 | A | --- | 40 | C40 | SVR | 301 | H | 3.88 |
| 259. | 2284 | CD1 | PHE | 294 | A | --- | 59 | C59 | SVR | 301 | H | 3.43 |
| 260. | 2285 | CD2 | PHE | 294 | A | --- | 45 | O45 | SVR | 301 | H | 3.88 |
| 261. | 2286 | CE1 | PHE | 294 | A | --- | 59 | C59 | SVR | 301 | H | 3.11 |
| 262. | 2287 | CE2 | PHE | 294 | A | --- | 59 | C59 | SVR | 301 | H | 3.82 |
| 263. | 2288 | CZ  | PHE | 294 | A | --- | 59 | C59 | SVR | 301 | H | 3.32 |

Number of hydrogen bonds: 7  
Number of non-bonded contacts: 263

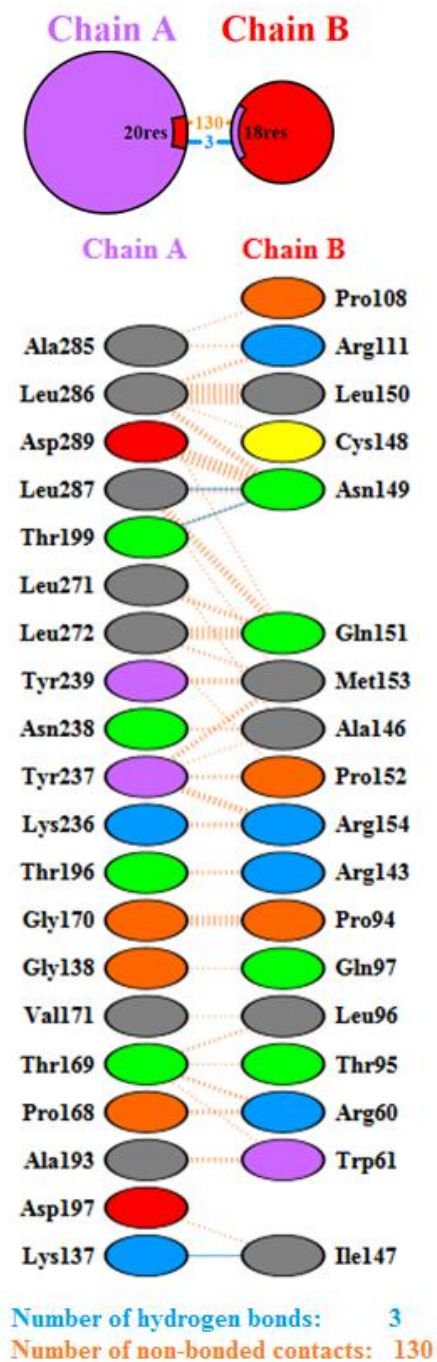

**Figure S4:** Hydrogen bonds and non-bonded contact (hydrophobic interactions) between 3CL M<sup>pro</sup> and 2s albumin.



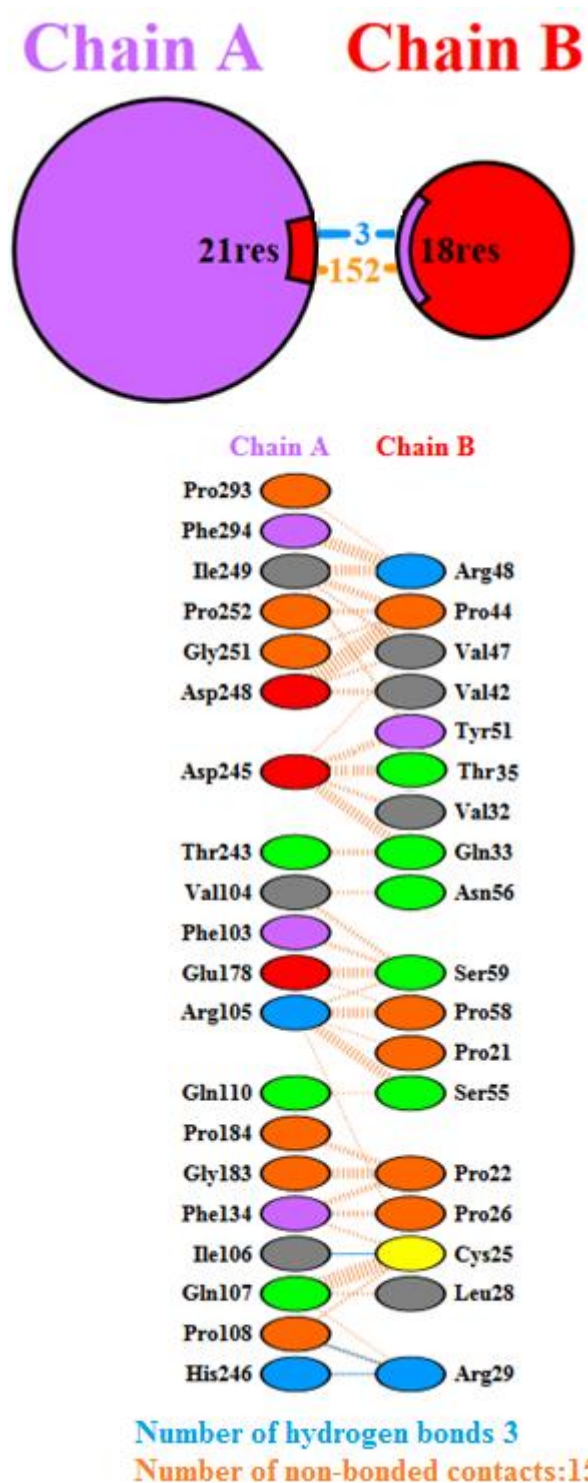

**Figure S5:** Hydrogen bonds and non-bonded contact (hydrophobic interactions) between 3CL M<sup>Pro</sup> and flocculating protein.

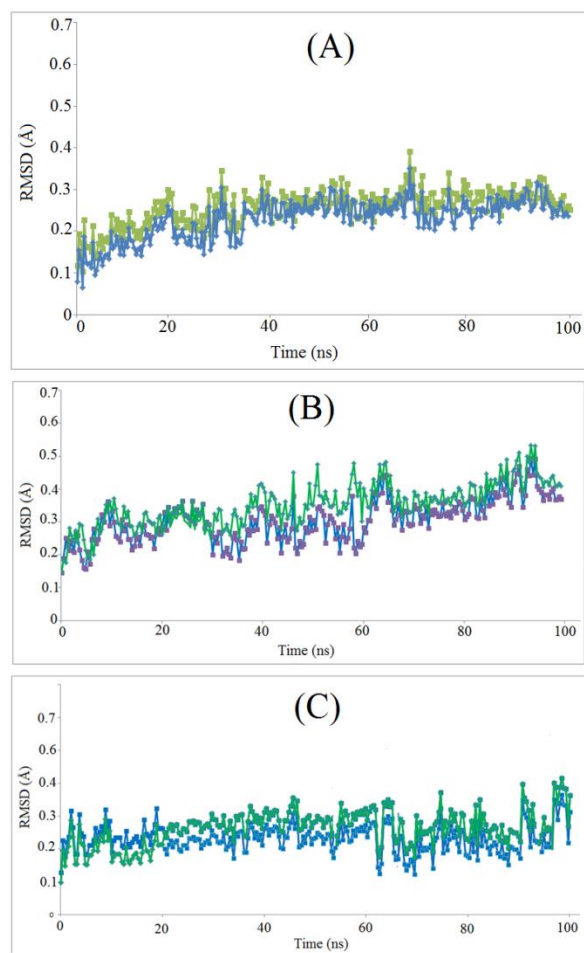

**Figure S6:** RMSD vs Time graph for 100 ns MD simulation of 3CLM<sup>pro</sup> (green) with (A) Suramin (B) 2S albumin (C) Flocculating protein (blue)

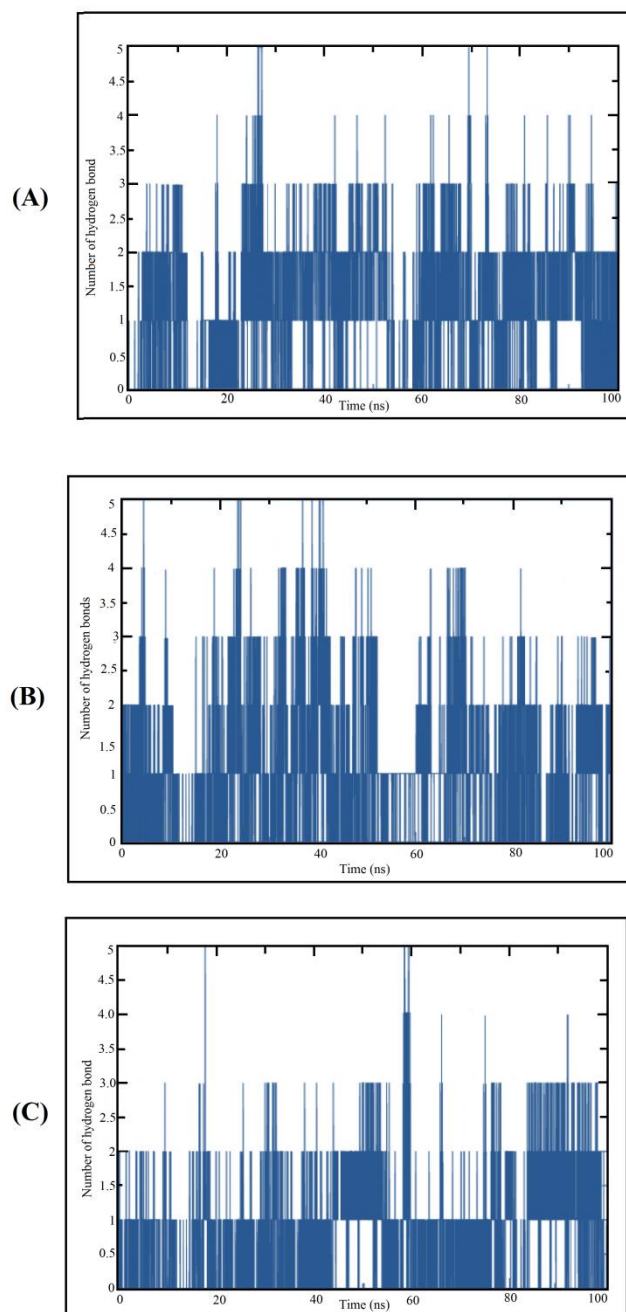

**Figure S7:** Graphs of hydrogen bonds plotted vs time for 100 ns range simulations of 3CLM<sup>pro</sup> and (A) Suramin (B) 2S albumin (C) Flocculating protein
